# Supplementary material
Source: publisher site journal article supplement (https://www.dovepress.com/article/358830)

**Supplementary 1 The mRNA expression of Mfn1 and Mfn2 of cisplatin-induced mouse AKI models.**

The data was presented as the mean ± SEM, ns = no significance, ****P* <0.001, n=4-6.


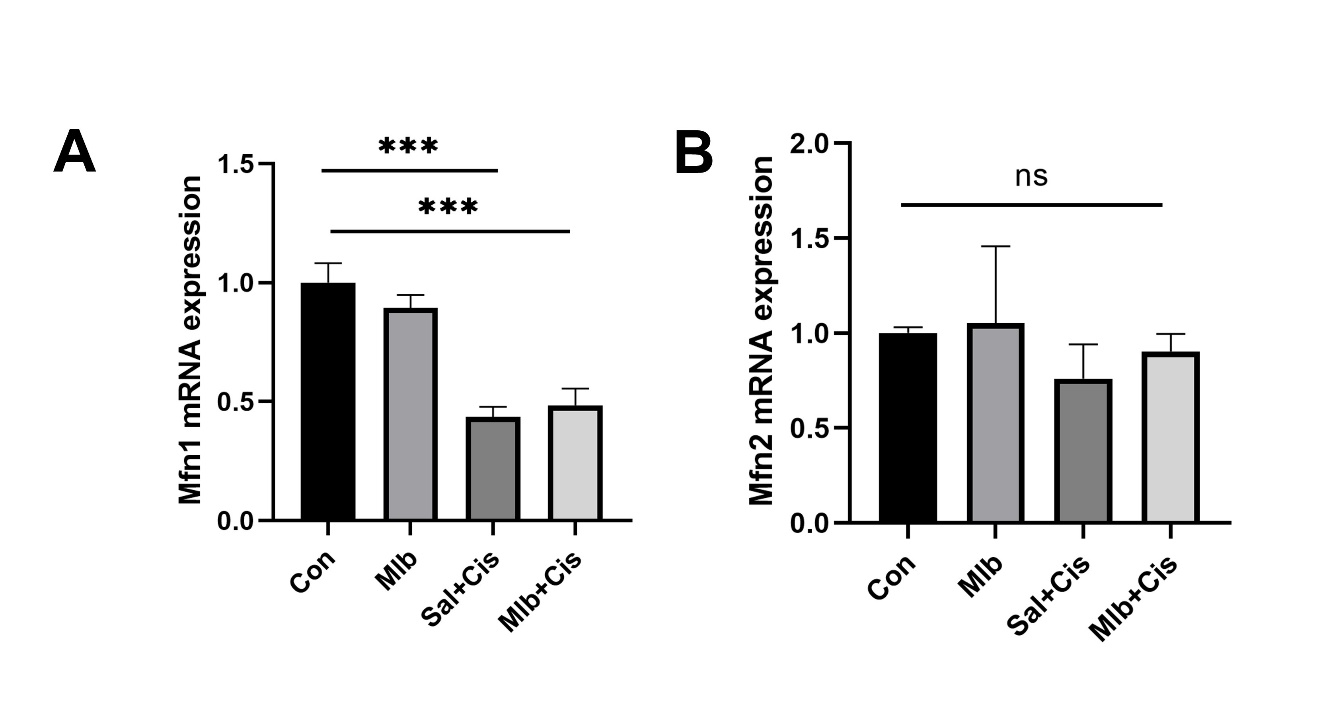


**Supplementary 2 Original data of western blot.**

(A) Western blot figures for Figure 2. (B) Western blot figures for Figure 3. (C)Western blot figures for Figure 5. (D) Western blot figures for Figure 6.


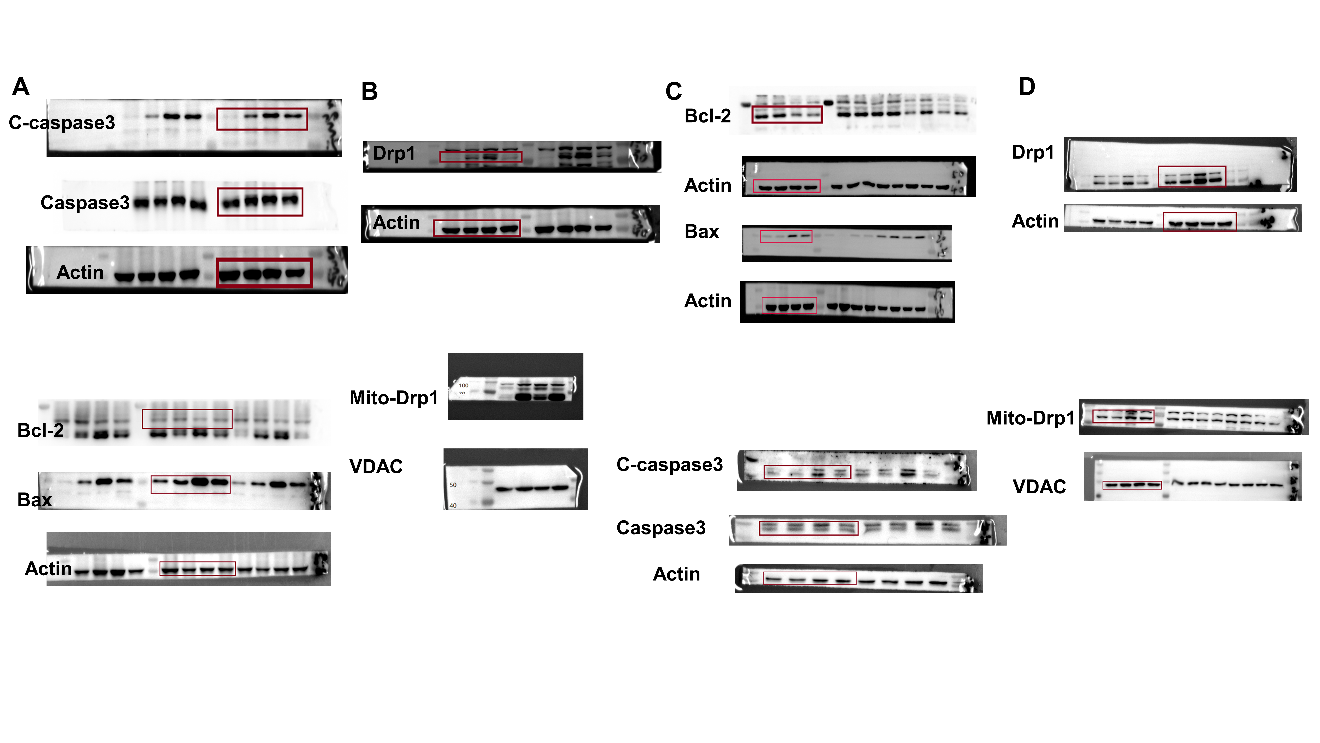

Supplement: Supplementary file 1 [file get_supplementary_file.php]
